# Supplementary material
Source: MDPI journal article supplement (https://www.mdpi.com/2071-1050/14/21/14582)
Supplement: s1 [file s1]

# Supplementary Materials

## Questionnaire structure

Survey of the vehicles in Mongolia

Thank you for your cooperation in this survey.

The purpose of this survey is to obtain data about cars in Mongolia.

Please answer the following questions:

You will take approximately 5~10 minutes to complete the survey.

The answers will not be used for any other purpose besides-academic research.

Ministry of Environment and Tourism, Mongolia

Tulga Mendjargal

### Section S1

Do you have a vehicle?

- Yes
- No

Please answer about your vehicle.

※If you have several vehicles, please answer considering the one you best known.

If you don't know the answer, you should leave blank.

Manufacturer

- Toyota
- Nissan
- Hyundai
- Mercedes Benz
- Other...

Which kind of engine does your vehicle have?

- Fuel/Diesel engine
- Electric

- Gas engine (LPG, LNG)
- Hybrid

Model of your vehicle?

Model year (production year)

Engine displacement (cc)

Imported year (for example 2018)

Mileage as of answer (9 km)

When did you obtain it?

How did you obtain it?

- I bought it new
- I bought it used (imported)
- Received from a friend (domestic)
- Other...

Even though it can still be used, in any of the following ways?

- Sell it to dealers as a used vehicle
- Dispose of it in a trash collector
- Give or sell it to a friend or someone
- Not discard
- Other...

If it can't function anymore, how would you discard it?

- Sell it to dealers as a used vehicle
- Dispose of it in a trash collector
- Give or sell it to a friend
- Leave it at home
- Other...

For how long will you still use it?

- 1-2 year
- 3-4 years
- 5-6 years
- 7-8 years
- 9-10 years
- Until it breaks down

How often do you use it?

- Almost never
- 1~2 day per a week
- 3~4 days per a week
- 5~6 days per a week
- Almost every day

Please provide an approximate of the mileage in a week of use. (km)

What is the fuel consumption of your car? (l/100km)

Please write average fuel consumption. For Example in summer (10l/100km) and in winter (25 l/km) than please answer (12.5l/100km)

Have you had a vehicle before your current one?

- Yes
- No

How many times did you go to the maintenance/repair service per year?

- 0-2
- 3-5
- More

How many times did you change the battery?

Why did you choose your vehicle?

How satisfied are you with your vehicle

### **Section S3**

Please answer about your previous vehicle.

Manufacturer

- Toyota
- Nissan
- Hyundai
- Mercedes Benz
- Other...

Which kind of engine does your vehicle have?

- Fuel/Diesel engine
- Electric
- Gas engine (LPG, LNG)
- Hybrid

Model of your vehicle?

Model year (production year)

Engine displacement (cc)

Imported year (for example 2018)

Mileage as of answer 9 km)

When did you obtain it?

When did you discard it?

Mileage when discarded [km]

How did you obtain it?

- I bought it new.
- I bought it used or received it for a friend.
- Other

How did you discard it?

- Sold it to dealers in a used cars
- Disposed it at a trash collector
- Gave or sold it
- Left it at home
- Other...

Why did you discard it?

- It broke down
- I changed to another vehicle
- I didn't net it anymore

## **Section S4**

Please answer about you

Gender

- Male
- Female

Age:

Address:

The approximate income per year (USD)

- 750~1000[\$]
- 1000~1749[\$]
- 1750~2499[\$]
- 2500~4999[\$]
- 5000~7499[\$]
- 7500~9999[\$]
- 10000~34999[\$]
- 35000~[\$]
- No answer

#### Occupation

- Student
- Full-time employee (public sector)
- Full-time employee (private sector)
- Self-employed
- Housewife
- Part-time
- Unemployed
- Other...

THANK YOU VERY MUCH FOR YOUR TIME

If you have any opinions or comments about this survey, please feel free to write.
